# Supplementary material
Source: publisher figshare collection journal article supplement (https://becaris.figshare.com/articles/dataset/_/25745319)

Supplementary figure G. Median overall survival comparison between adjuvant and neoadjuvant chemotherapy in (A) MSI-H and (B) MSI-L.


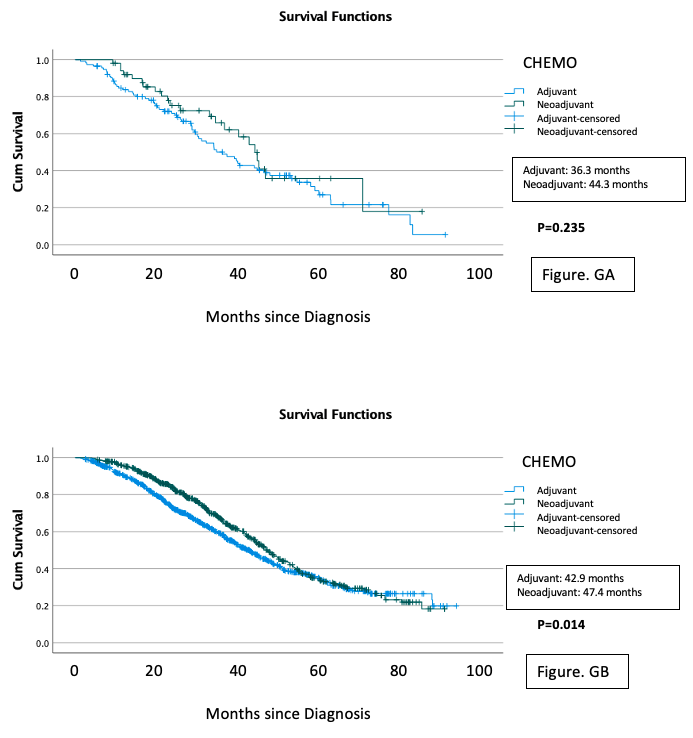

Supplement: Supplementary file 1 [file 1]
